# Supplementary material for: Development and Validation of a One-Step Reverse Transcription Real-Time PCR Assay for Simultaneous Detection and Identification of Tomato Mottle Mosaic Virus and Tomato Brown Rugose Fruit Virus
Source: Preprints.org preprint supplement (doi:10.20944/preprints202112.0509.v1), 2021-12-31
Supplement: Supplementary file 1 [file supplementary]

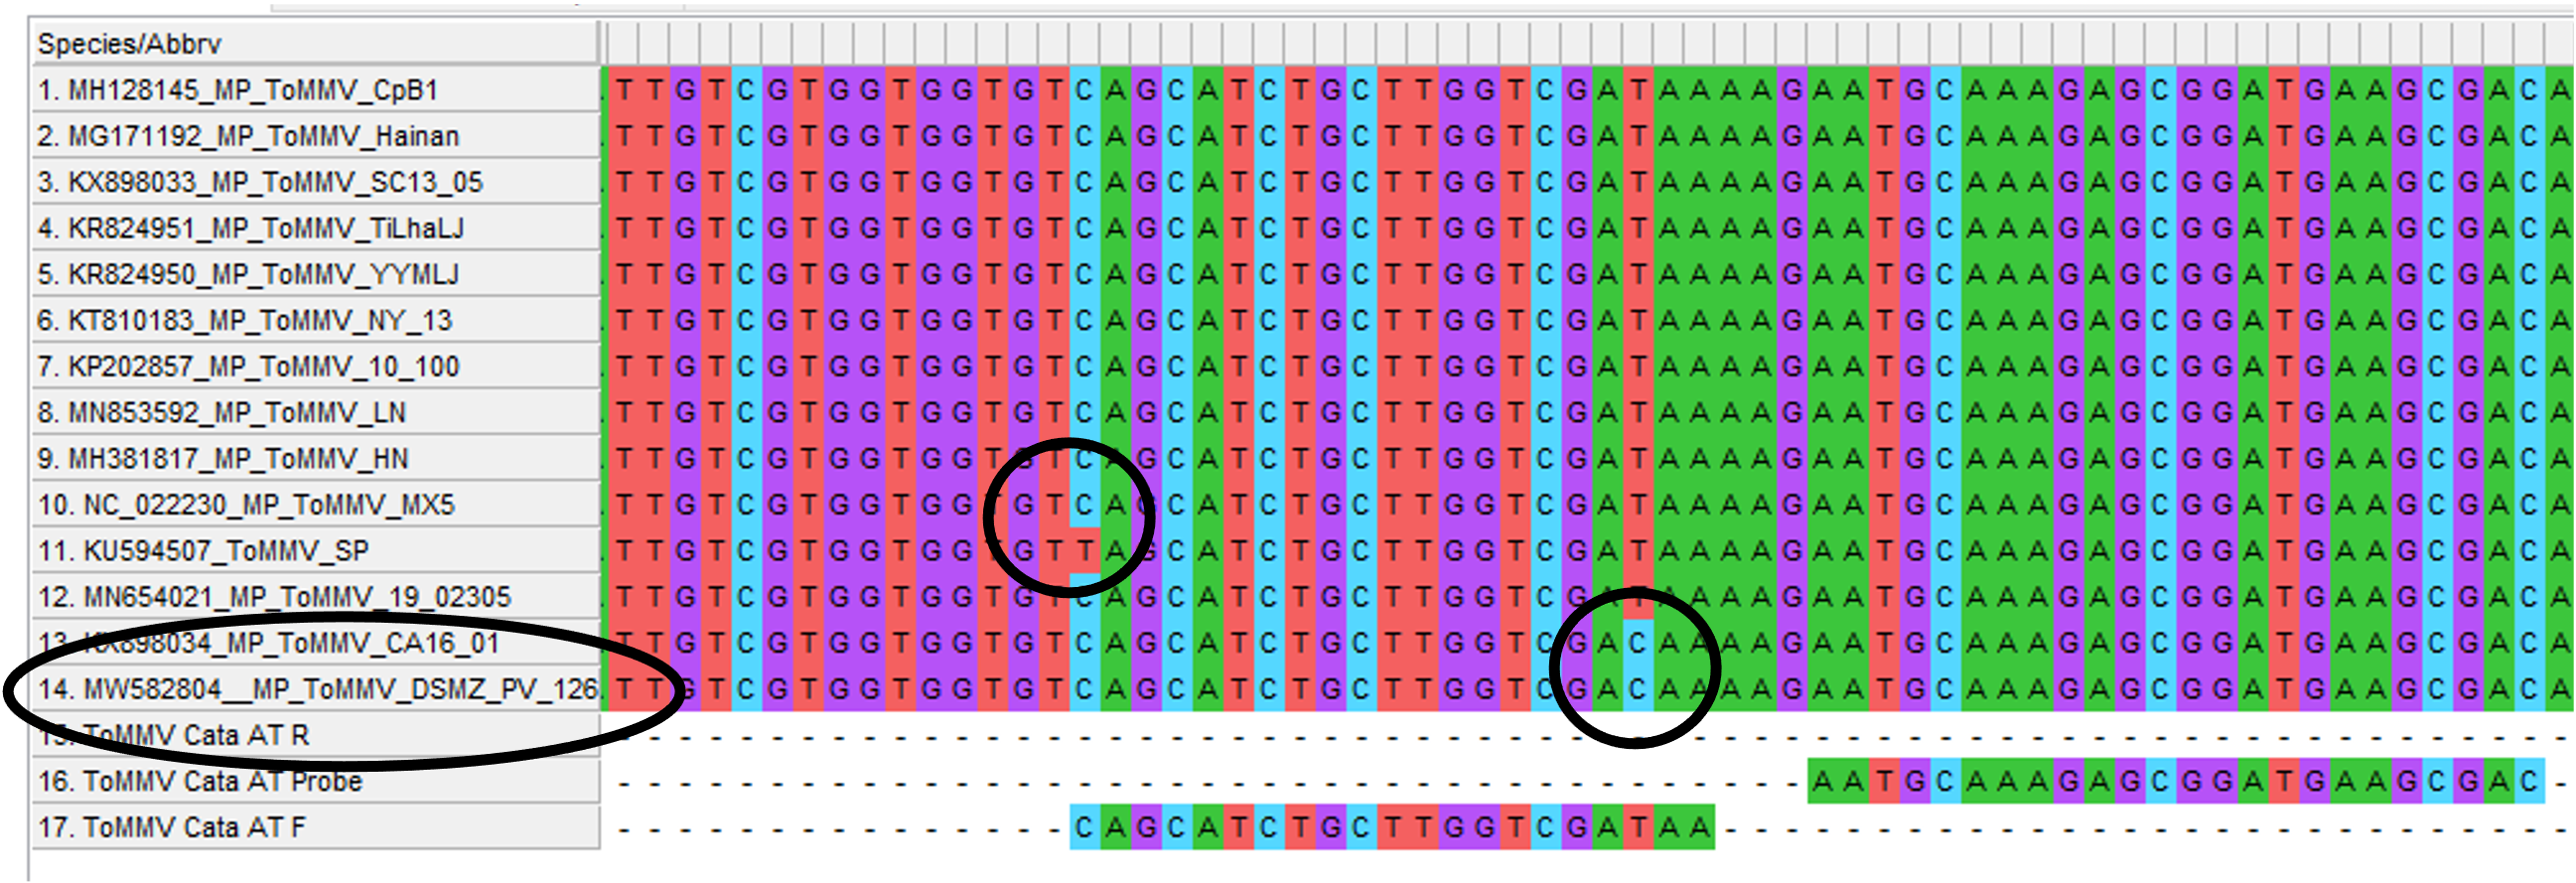

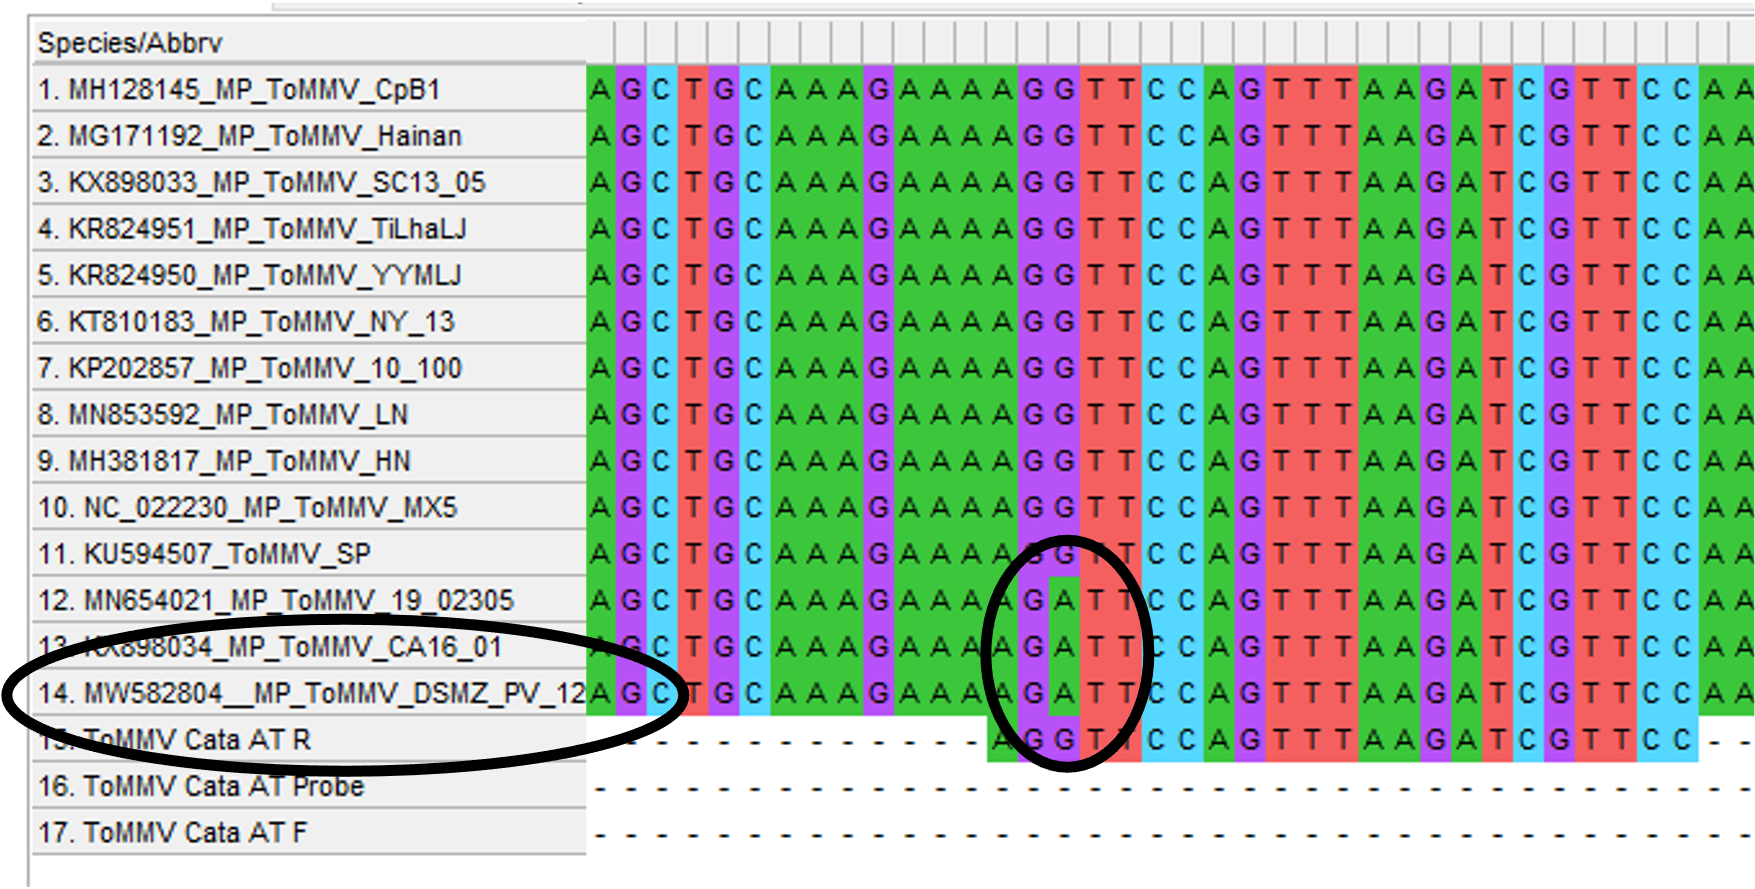


**Supplementary figure 1.** *In-silico* analysis (alignment by Clustal X) of the ToMMV selected primers/probe set (set 3) versus all the full-genome sequences of ToMMV available in GenBank. Highlighted are nucleotide polymorphisms observed in forward and reverse primer sequence.
